# Supplementary material for: Isoreticular covalent organic frameworks for hydrocarbon uptake and separation: the important role of monomer planarity
Source: Royal Society of Chemistry journal article supplement (doi:10.1039/c7ce00344g), 2017-01-01
Supplement: c7ce00344g1.pdf [file c7ce00344g1.pdf]

Supplementary Information

Isorecticular Covalent Organic Frameworks for Hydrocarbon Uptake and  
Separation: The Important Role of Monomer Planarity

Jinqiao Dong<sup>†</sup>, Yuxiang Wang<sup>†</sup>, Guoliang Liu, Youdong Cheng and Dan Zhao\*

Department of Chemical and Biomolecular Engineering, National University of Singapore, 4  
Engineering Drive 4, Singapore 117585

Correspondence and requests for materials should be addressed to D.Z. (E-mail:  
[chezhao@nus.edu.sg](mailto:chezhao@nus.edu.sg)).

## Materials and Methods

All the reagents were obtained from commercial suppliers and used without further purification. Fourier transform infrared spectroscopy (FTIR) data were obtained with a Bio-Rad FTS-3500 ARX FTIR spectrometer. Powder X-ray diffraction (PXRD) patterns were obtained on a Bruker D8 Advance X-ray powder diffractometer equipped with a Cu sealed tube ( $\lambda = 1.54178 \text{ \AA}$ ) at a scan rate of  $2^\circ \text{ min}^{-1}$ . Field-emission scanning electron microscopy (FE-SEM) was conducted on a JEOL JSM-7610F scanning electron microscope. Samples were treated via Pt sputtering for 100 s before observation. High-resolution transmission electron microscopy (HR-TEM) was conducted on a JEOL JEM-3010 transmission electron microscope. Thermogravimetric analyses (TGA) were performed using a Shimadzu DTG-60AH in the temperature range of 100 to 800 °C under flowing air ( $50 \text{ mL min}^{-1}$ ) and a heating rate of  $10^\circ \text{ C min}^{-1}$ .  $\text{N}_2$  sorption isotherms were measured using a Micromeritics ASAP 2020 surface area and pore size analyzer. Before the measurements, the samples were degassed under high vacuum ( $< 0.01 \text{ Pa}$ ) at 120 °C for 10 h. UV/visible spectra were collected on a Shimadzu UV-3600 spectrometer using the  $\text{BaSO}_4$  reflectance standard at room temperature.

## Synthetic Procedures

Three amine linkages tris(4-aminotriphenyl)amine (TAPA), 1,3,5-tris(4-aminophenyl)benzene (TAPB) and 2,4,6-tris(4-aminophenyl)-s-triazine (TAPT) were synthesized as previously reported.<sup>1-4</sup> Briefly, a pyrex tube was charged with TAPA (29 mg, 0.1 mmol), 1,3,5-triformylbenzene (16.2 mg, 0.1 mmol), THF (0.75 mL) and mesitylene (0.25 mL). The tube was immersed in an ultrasonic bath and sonicated for 5 min. After that, aqueous acetic acid (6 M, 0.1 mL) was added and the tube was flash frozen at liquid  $\text{N}_2$  bath, evacuated and sealed. The tube was warmed to room temperature before heating to 120 °C in a convection oven for 3 days. The resulting N-COF precipitate was isolated by vacuum filtration and then underwent solvent exchange with diethyl ether for three days, and was fully activated at 120 °C under vacuum for 8 h to afford a red powder. P-COF and T-COF were synthesized in

1,4-dioxane (1 mL) and 1,4-dioxane/mesitylene (0.5 mL and 0.5 mL), respectively, with the same synthetic procedures as that of N-COF.

### Gas Sorption Measurements

N<sub>2</sub> sorption isotherms of the COFs were measured up to 1 bar using a Micromeritics ASAP 2020, and C<sub>2</sub>H<sub>6</sub> and CH<sub>4</sub> sorption isotherms were measured up to 800 torr using a Quantachrome Autosorb iQ. Before the measurements, the samples were degassed under a reduced pressure (< 10<sup>-2</sup> Pa) at 150 °C for 10 h. UHP grade gases were used for gas sorption measurements. Pore size distribution data were calculated from the N<sub>2</sub> adsorption isotherms at 77 K based on non-local density functional theory (NLDFT) model in the Micromeritics ASAP 2020 software package (assuming slit pore geometry).

### Calculation of Isotheric Heat of Adsorption ( $Q_{st}$ )

The gas adsorption isotherms measured at 283 K and 298 K were firstly fitted to a virial equation (Equation 1). The fitting parameters were then used to calculate the isotheric heat of adsorption ( $Q_{st}$ ) using Equation 2,

$$\ln P = \ln N + \frac{1}{T} \sum_{i=0}^m a_i N^i + \sum_{i=0}^n b_i N^i \quad (1)$$

$$Q_{st} = -R \sum_{i=0}^m a_i N^i \quad (2)$$

where  $P$  is pressure (mmHg),  $N$  is adsorbed quantity (mmol g<sup>-1</sup>),  $T$  is temperature (K),  $R$  is gas constant (8.314 J K<sup>-1</sup> mol<sup>-1</sup>),  $a_i$  and  $b_i$  are virial coefficients,  $m$  and  $n$  represent the number of coefficients required to adequately describe the isotherms (herein,  $m = 5$ ,  $n = 2$ ).

### Calculation of Gas Selectivity Based On Ideal Adsorption Solution Theory (IAST)<sup>5</sup>

The gas adsorption isotherms were firstly fitted to a dual-site Langmuir-Freundlich (DSLFF) model (Equation 3),

$$q = \frac{q_{sat,A} b_A p^{\alpha_A}}{1 + b_A p^{\alpha_A}} + \frac{q_{sat,B} b_B p^{\alpha_B}}{1 + b_B p^{\alpha_B}} \quad (3)$$

where  $q$  is the amount of adsorbed gas (mmol g<sup>-1</sup>),  $p$  is the bulk gas phase pressure (bar),  $q_{sat}$  is the saturation amount (mmol g<sup>-1</sup>),  $b$  is the Langmuir-Freundlich parameter (bar<sup>- $\alpha$</sup> ),  $\alpha$  is the Langmuir-Freundlich exponent (dimensionless) for two adsorption sites A and B indicating the presence of weak and strong adsorption sites.

IAST starts from the Raoult's Law type of relationship between fluid and adsorbed phase,

$$P_i = Py_i = P_i^o x_i \quad (4)$$

$$\sum_{i=1}^n x_i = \sum_{i=1}^n \frac{P_i}{P_i^o} = 1 \quad (5)$$

where  $P_i$  is partial pressure of component  $i$  (bar),  $P$  is total pressure (bar),  $y_i$  and  $x_i$  represent mole fractions of component  $i$  in gas and adsorbed phase (dimensionless).  $P_i^o$  is equilibrium vapour pressure (bar).

In IAST,  $P_i^o$  is defined by relating to spreading pressure  $\pi$ ,

$$\frac{\pi S}{RT} = \int_0^{P_i^o} \frac{q_i(P_i)}{P_i} dP_i = \Pi \text{ (Constant)} \quad (6)$$

where  $\pi$  is spreading pressure,  $S$  is specific surface area of adsorbent ( $\text{m}^2 \text{g}^{-1}$ ),  $R$  is gas constant ( $8.314 \text{ J K}^{-1} \text{ mol}^{-1}$ ),  $T$  is temperature (K),  $q_i(P_i)$  is the single component equilibrium obtained from isotherm ( $\text{mmol g}^{-1}$ ).

For a dual-site Langmuir-Freundlich (DSLRF) model, we have an analytical expression for the integral,

$$\int_0^{P_i^o} \frac{q_i(P_i)}{P_i} dP_i = \Pi \text{ (Constant)} = \frac{q_{sat,A}}{\alpha_A} \ln[1 + b_A (P_i^o)^{\alpha_A}] + \frac{q_{sat,B}}{\alpha_B} \ln[1 + b_B (P_i^o)^{\alpha_B}] \quad (7)$$

The isotherm parameters will be known from the previous fitting. For a binary component system the unknowns will be  $\Pi$ ,  $P_1^o$ , and  $P_2^o$  which can be obtained by simultaneously solving Equations 4 and 6.

The adsorbed amount for each component in a mixture is

$$q_i^{mix} = x_i q_T \quad (8)$$

$$\frac{1}{q_T} = \sum_{i=1}^n \frac{x_i}{q_i(P_i^o)} \quad (9)$$

where  $q_i^{mix}$  is the adsorbed amount of component  $i$  ( $\text{mmol g}^{-1}$ ),  $q_T$  is the total adsorbed amount ( $\text{mmol g}^{-1}$ ).

The adsorption selectivities  $S_{ads}$  were calculated using Equation 9.

$$S_{ads} = \frac{q_1 / q_2}{p_1 / p_2} \quad (10)$$

In this study, IAST calculations were carried out assuming  $\text{C}_2\text{H}_4/\text{C}_2\text{H}_6$  (50/50) binary mixed gases at 298 K and pressures up to 1 bar.

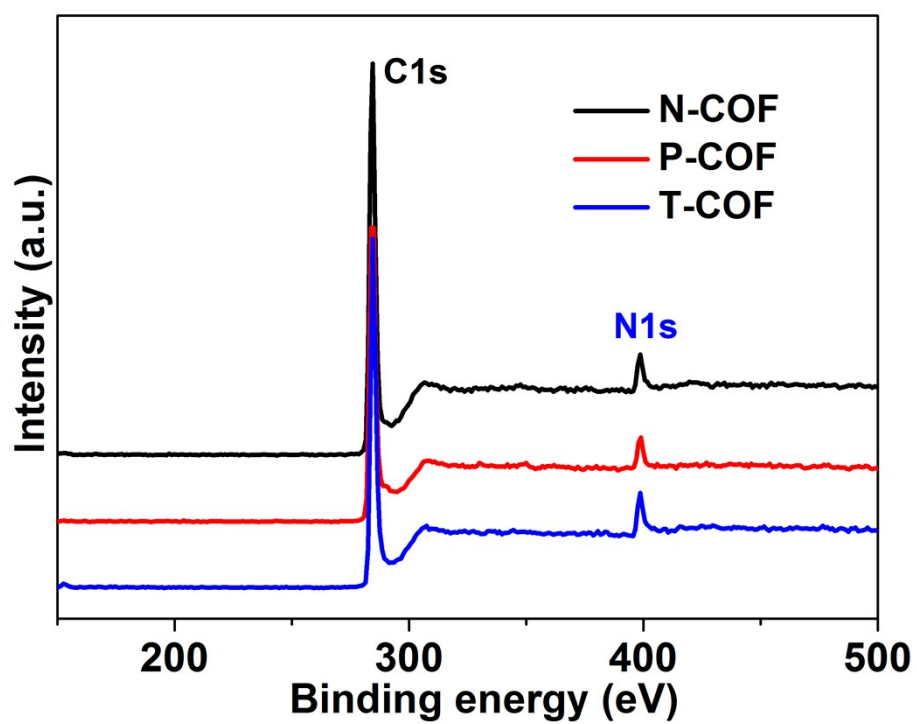

**Figure S1.** XPS spectra of N-COF, P-COF and T-COF.

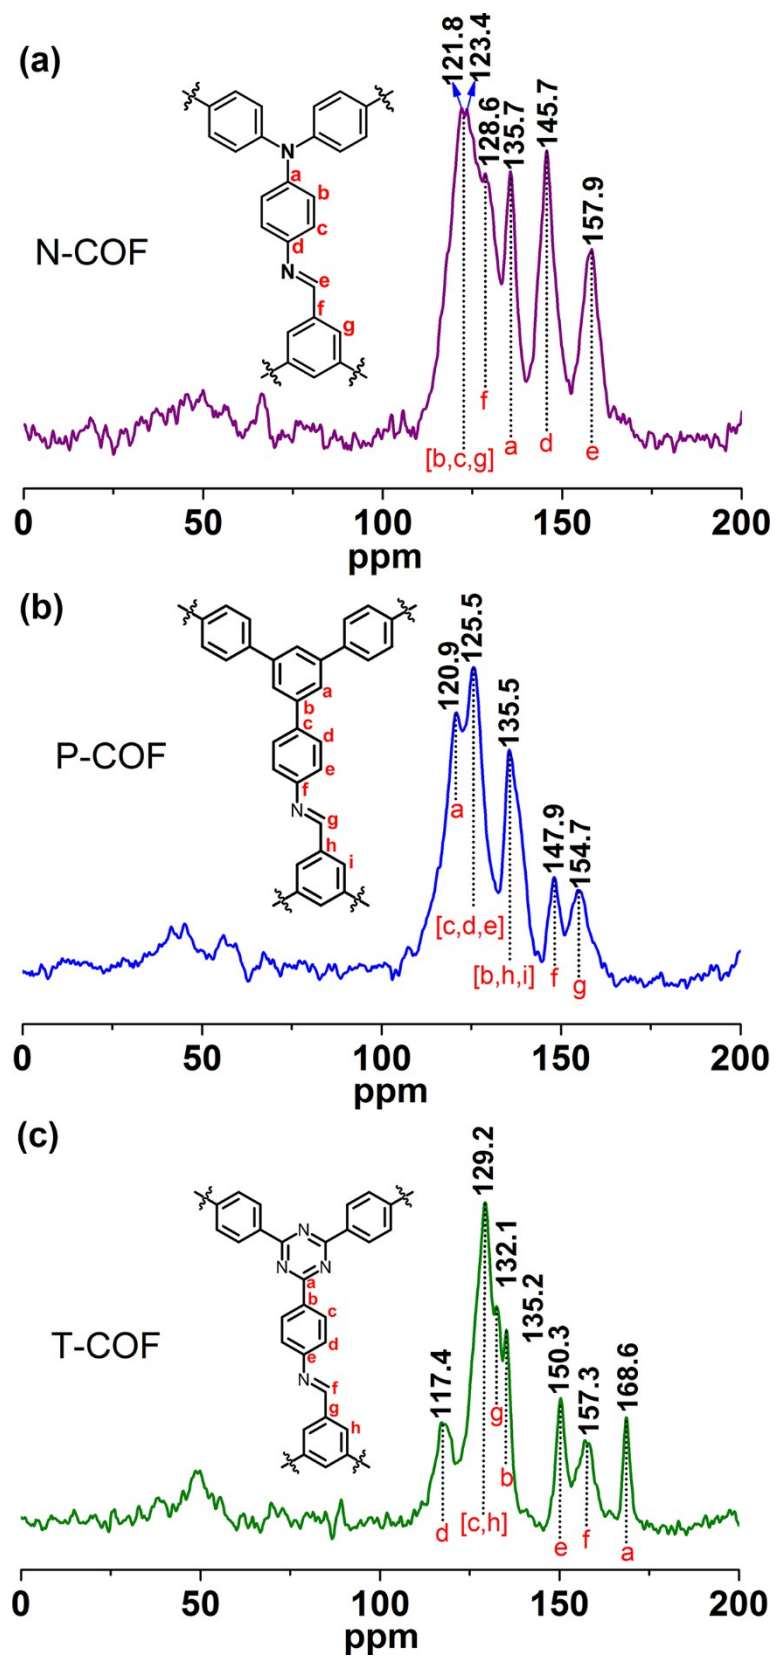

**Figure S2.** Solid-state  $^{13}\text{C}$  CP/MAS NMR spectra of N-COF (a), P-COF (b) and T-COF (c).

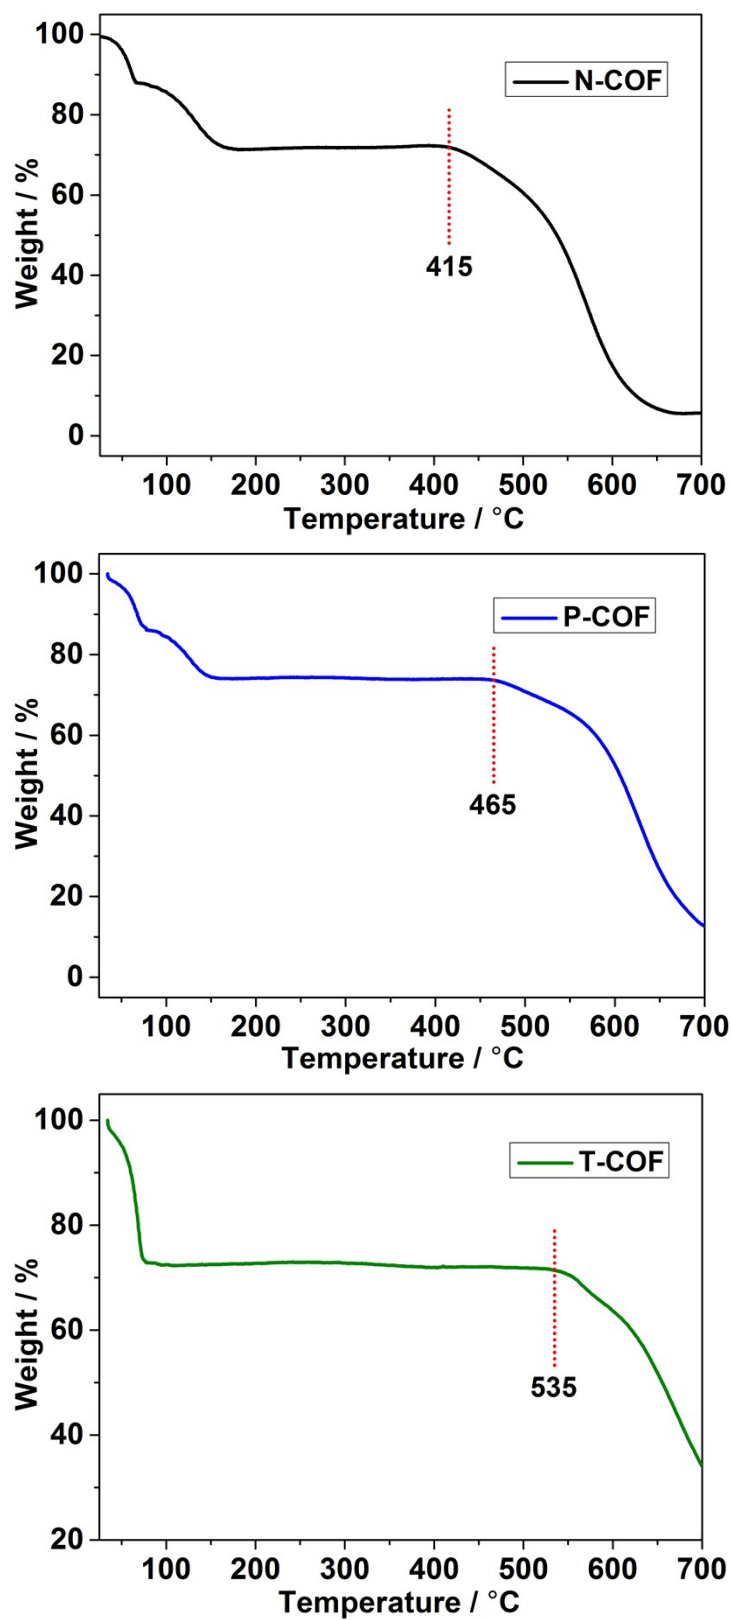

**Figure S3.** TGA curves of N-COF, P-COF and T-COF.

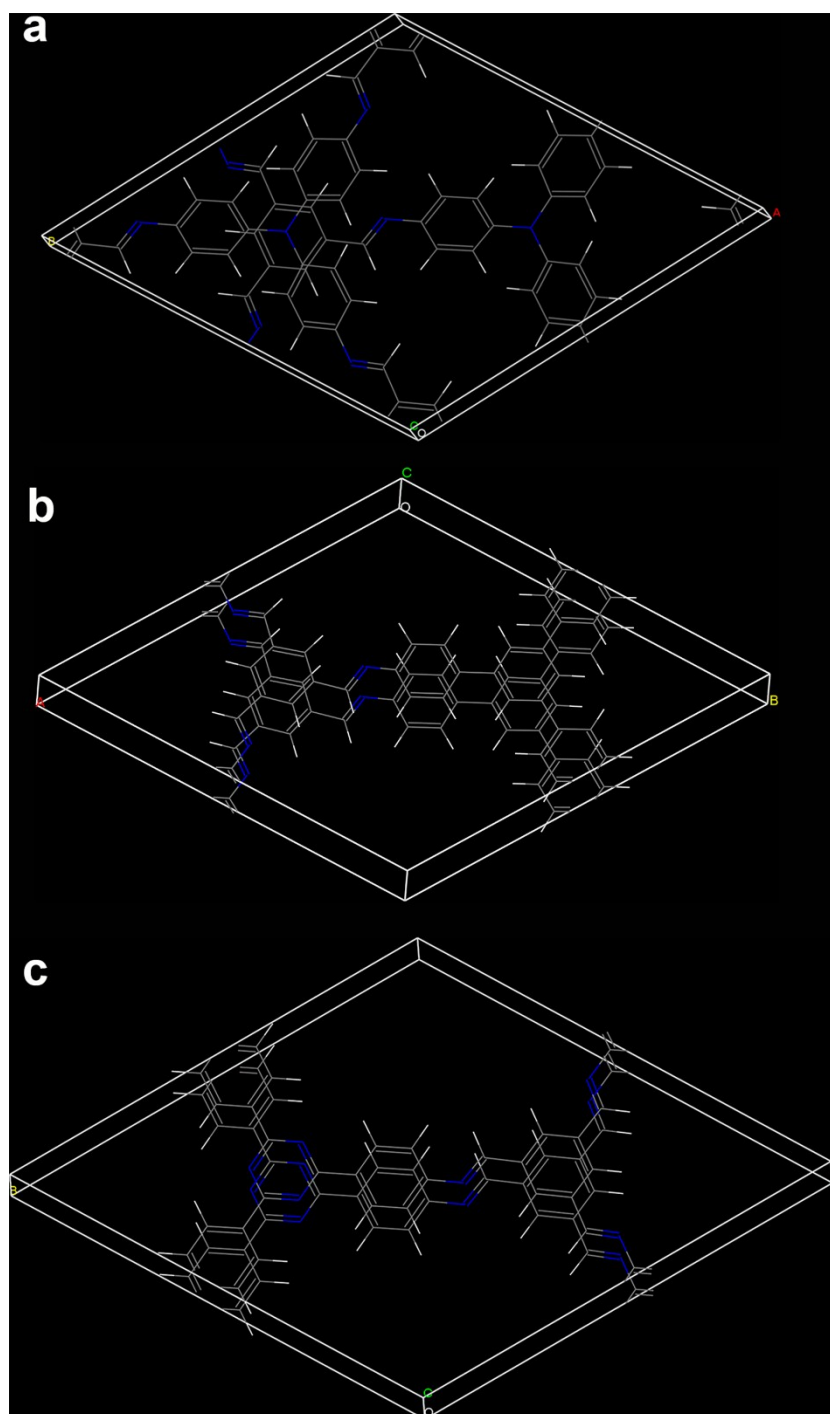

**Figure S4.** Cell unit images of N-COF (a), P-COF (b) and T-COF (c).



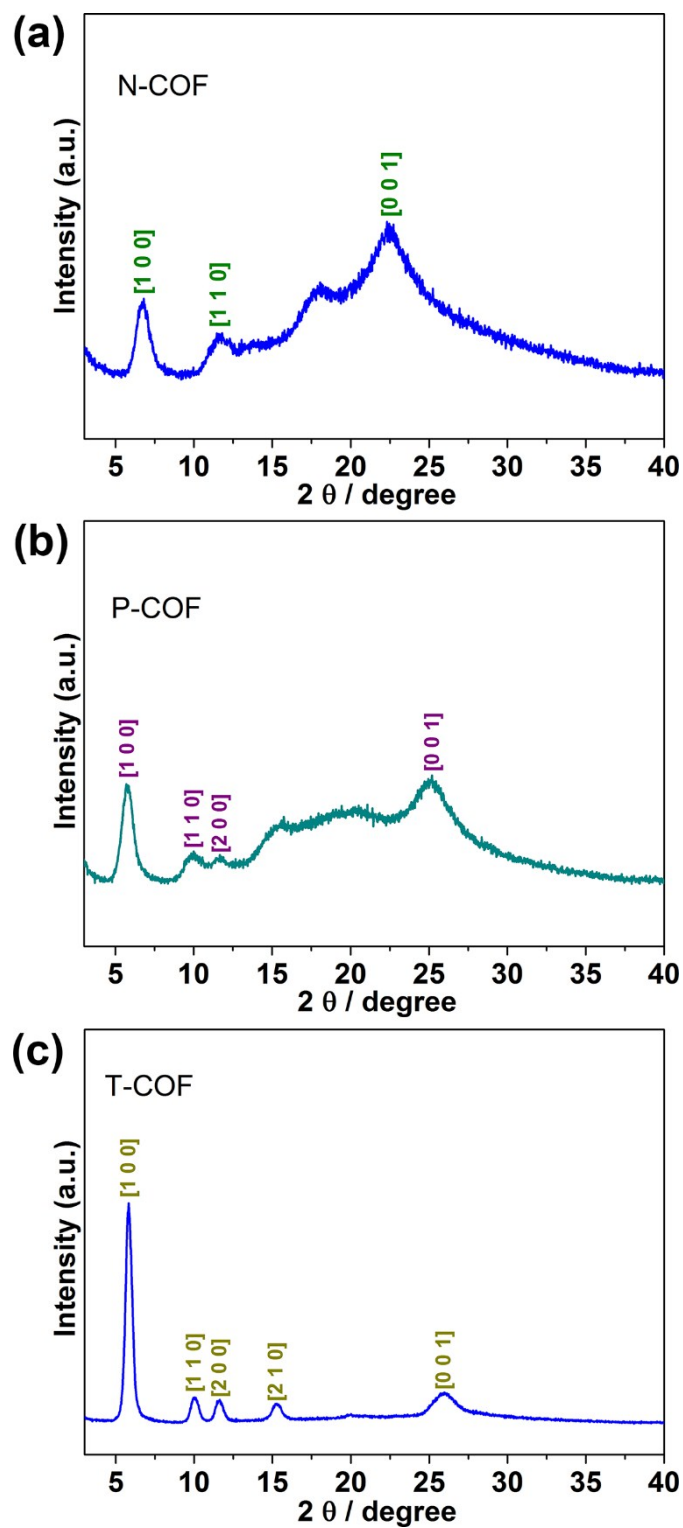

**Figure S5.** PXRD patterns of N-COF (a), P-COF (b), and T-COF (c) after gas sorption tests.

**Table S1.** Parameters for the simulated AB stacking crystal structure of N-COF.

|                                          |                   |
|------------------------------------------|-------------------|
| Structure code                           | <b>N-COF</b>      |
| Formula                                  | $C_{54}N_8H_{36}$ |
| M (g mol <sup>-1</sup> )                 | 796.9             |
| Crystal system                           | trigonal          |
| Space group                              | <i>P</i> 3 (143)  |
| a / Å                                    | 16.18             |
| b / Å                                    | 16.18             |
| c / Å                                    | 8.00              |
| $\alpha$ / deg.                          | 90                |
| $\beta$ / deg.                           | 90                |
| $\gamma$ / deg.                          | 120               |
| V / Å <sup>3</sup>                       | 1812.6            |
| Calculated density (g cm <sup>-3</sup> ) | 0.73              |
| surface area (Å <sup>2</sup> )           | 604.52            |
| Free Volume (Å <sup>3</sup> )            | 982.24            |

**Table S2.** Parameters for the simulated AA stacking crystal structure of P-COF.

|                                          |                                                |
|------------------------------------------|------------------------------------------------|
| Structure code                           | <b>P-COF</b>                                   |
| Formula                                  | C <sub>33</sub> N <sub>3</sub> H <sub>21</sub> |
| M (g mol <sup>-1</sup> )                 | 459.5                                          |
| Crystal system                           | hexagonal                                      |
| Space group                              | <i>P</i> -6 (174)                              |
| <i>a</i> / Å                             | 18.67                                          |
| <i>b</i> / Å                             | 18.67                                          |
| <i>c</i> / Å                             | 3.62                                           |
| $\alpha$ / deg.                          | 90                                             |
| $\beta$ / deg.                           | 90                                             |
| $\gamma$ / deg.                          | 120                                            |
| <i>V</i> / Å <sup>3</sup>                | 1091.8                                         |
| Calculated density (g cm <sup>-3</sup> ) | 0.70                                           |
| surface area (Å <sup>2</sup> )           | 223.24                                         |
| Free Volume (Å <sup>3</sup> )            | 572.63                                         |

**Table S3.** Parameters for the simulated AA stacking crystal structure of T-COF.

|                                          |                                                |
|------------------------------------------|------------------------------------------------|
| Structure code                           | <b>T-COF</b>                                   |
| Formula                                  | C <sub>30</sub> N <sub>6</sub> H <sub>18</sub> |
| M (g mol <sup>-1</sup> )                 | 462.5                                          |
| Crystal system                           | hexagonal                                      |
| Space group                              | <i>P</i> -6 (174)                              |
| a / Å                                    | 18.56                                          |
| b / Å                                    | 18.56                                          |
| c / Å                                    | 3.50                                           |
| $\alpha$ / deg.                          | 90                                             |
| $\beta$ / deg.                           | 90                                             |
| $\gamma$ / deg.                          | 120                                            |
| V / Å <sup>3</sup>                       | 1043.9                                         |
| Calculated density (g cm <sup>-3</sup> ) | 0.74                                           |
| surface area (Å <sup>2</sup> )           | 220.29                                         |
| Free Volume<br>(Å <sup>3</sup> )         | 557.84                                         |

## References

1. D. Yang, J. Zhao, Y. Zhao, Y. Lei, L. Cao, X. J. Yang, M. Davi, N. de Sousa Amadeu, C. Janiak and Z. Zhang, *Angew. Chem., Int. Ed.*, 2015, **54**, 8658-8661.
2. G. Li and Z. Wang, *Macromolecules* 2013, **46**, 3058-3066.
3. J. J. Armao IV, Y. Domoto, T. Umehara, M. Maaloum, C. Contal, G. Fuks, E. Moulin, G. Decher, N. Javahiraly and N. Giuseppone, *ACS Nano*, 2016, **10**, 2082-2090.
4. B. Wu, F. Cui, Y. Lei, S. Li, N. de Sousa Amadeu, C. Janiak, Y. J. Lin, L. H. Weng, Y. Y. Wang and X. J. Yang, *Angew. Chem., Int. Ed.*, 2013, **52**, 5096-5100.
5. A. L. Myers and J. M. Prausnitz, *AIChE J.*, 1965, **11**, 121-127.
